# Supplementary material for: Deep-Learning-Based Hepatic Ploidy Quantification Using H&E Histopathology Images
Source: MDPI journal article supplement (doi:10.3390/genes14040921), 2023-04-16
Supplement: s1 [file s1]

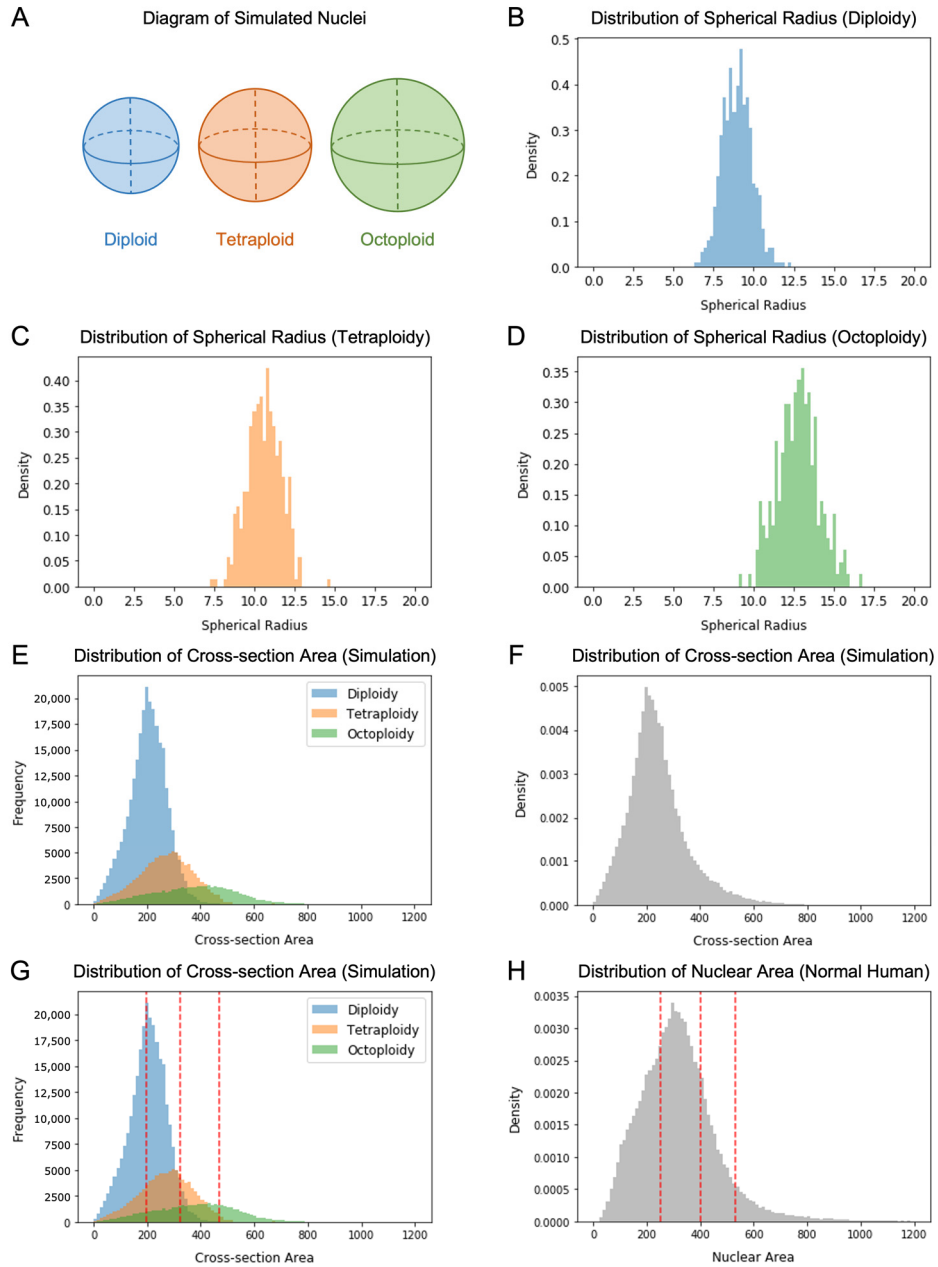

**Figure S1.** Illustration of the Gaussian mixture model fitting process for nuclear ploidy assessment. (A) A diagram of the scale of simulated nuclei across three categories. (B-D) The distributions of spherical radius of simulated diploid, tetraploid, or octoploid nuclei. (E) A histogram of the distribution of cross-section area of simulated diploid, tetraploid, and octoploid nuclei. (F) The distribution of all cross-section areas by mixing the data from three categories. (G) The resulting means after fitting a Gaussian mixture model to the mixed simulated cross-section areas, labelled with dotted red lines. (H) The resulting means after fitting a Gaussian mixture model to hepatocyte nuclear areas detected on eight normal human liver H&E slides, labelled with dotted red lines.

## ONLINE ANALYSIS

Please prepare your image file. The file requirements are listed below.

- The supported file type is .png or .tif.
- The file size should be smaller than 5MB.
- The image magnification should be 40x.
- The image dimension should not be larger than 500x500 pixels.

[More Image Examples](#)

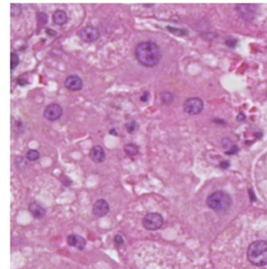

## INPUT YOUR PARAMETERS

Name

Institution Name

Email

(If providing a valid email, the notification of job completion will be sent to this email)

Threshold of Nuclear Relative Distance (pixel):

(Cutoff value used to determine whether two nuclei are in the same cell or different cells, a maximum of two decimal places)

Margin around Central Region (pixel):

(Width of padding area around central region to avoid incomplete information at the image edge,  $0 \leq \text{Integer} < 0.5 * \min(\text{width}, \text{height})$  of your image)

Your Image\*

No file chosen

**Figure S2.** Website for hepatic ploidy quantification on human H&E images.

Results

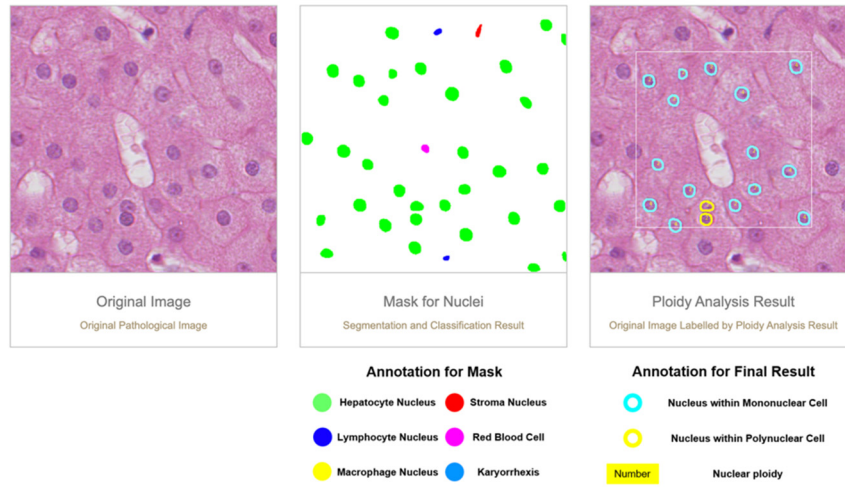

Download Cell Summary File

**B**

| Cell id | Cell location | Cellular ploidy | Nuclear ploidy | Total ploidy | Nuclear area | Nuclear ploidy probability (2, 4, 8)   |
|---------|---------------|-----------------|----------------|--------------|--------------|----------------------------------------|
| 1       | [113, 385]    | 1               | 4              | 4            | 425          | (0.26, 0.64, 0.1)                      |
| 2       | [116, 225]    | 1               | 2              | 2            | 367          | (0.5, 0.44, 0.06)                      |
| 3       | [126, 172]    | 1               | 2              | 2            | 203          | (0.97, 0.01, 0.03)                     |
| 4       | [140, 109]    | 1               | 2              | 2            | 365          | (0.51, 0.43, 0.06)                     |
| 5       | [164, 284]    | 1               | 4              | 4            | 489          | (0.12, 0.65, 0.23)                     |
| 6       | [176, 155]    | 1               | 2              | 2            | 280          | (0.88, 0.08, 0.03)                     |
| 7       | [274, 305]    | 1               | 2              | 2            | 348          | (0.6, 0.34, 0.05)                      |
| 8       | [297, 125]    | 1               | 2              | 2            | 309          | (0.79, 0.17, 0.04)                     |
| 9       | [310, 373]    | 1               | 4              | 4            | 420          | (0.27, 0.63, 0.09)                     |
| 10      | [343, 307]    | 1               | 2              | 2            | 320          | (0.74, 0.21, 0.04)                     |
| 11      | [346, 185]    | 1               | 2              | 2            | 371          | (0.48, 0.46, 0.06)                     |
| 12      | [373, 111]    | 1               | 4              | 4            | 430          | (0.24, 0.65, 0.1)                      |
| 13      | [373, 270]    | 1               | 2              | 2            | 335          | (0.67, 0.28, 0.05)                     |
| 14      | [387, 217]    | 2               | 2, 2           | 4            | 336, 364     | (0.67, 0.28, 0.05), (0.52, 0.42, 0.06) |
| 15      | [398, 400]    | 1               | 4              | 4            | 387          | (0.4, 0.53, 0.07)                      |
| 16      | [411, 158]    | 1               | 4              | 4            | 409          | (0.31, 0.6, 0.08)                      |

**Figure S3.** Example results from our online hepatic ploidy quantification tool. **(A)** The result page displays the mask for nuclei output from the HD-Staining model and the ploidy analysis result for hepatocytes. **(B)** A downloadable CSV file provides detailed information for each hepatocyte, including cell location, cellular ploidy, nuclear ploidy, total ploidy, individual nuclear area, and estimated nuclear ploidy probability.
